# Supplementary material
Source: PubMed Central journal article supplement (PMC9533882)
Supplement: mmc1.pdf [file mmc1.pdf]

**Immunity, Volume 34**

**Supplemental Information**

**CD94 Is Essential for NK Cell-Mediated Resistance  
to a Lethal Viral Disease**

**Min Fang, Mark T. Orr, Pieter Spee, Thomas Egebjerg, Lewis L. Lanier, and Luis J. Sigal**

Inventory

Supplemental Figures and Legends

Figure S1, related to Figure 3. Anti-NKG2 mAb 20D5HCmIgG1-Q blocks, but does not deplete NK cells *in vivo*.

Figure S2, related to Figure 4. Impaired NK cell control of virus loads in the absence of CD94 results in a defective CD8<sup>+</sup> T cell response.

Figure S3, related to Figure 6. Surface staining of reporter cells.

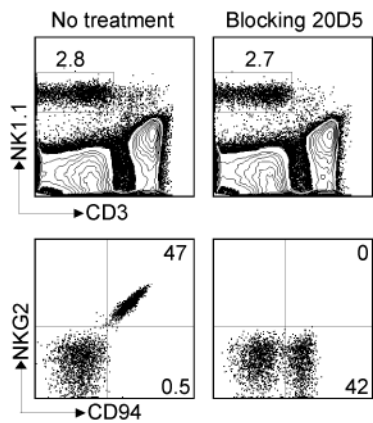

**Figure S1. Anti-NKG2 mAb 20D5HCmIgG1-Q blocks, but does not deplete NK cells *in vivo*.** Wild type B6 mice were treated i.p. with 150  $\mu$ g 20D5HCmIgG1-Q mAb in 500  $\mu$ l PBS. One day later, blood was obtained from untreated or treated mice and analyzed by flow cytometry. **Upper panel:** gated on total cells. **Lower panel:** gated on NK1.1+ CD3- NK cells.

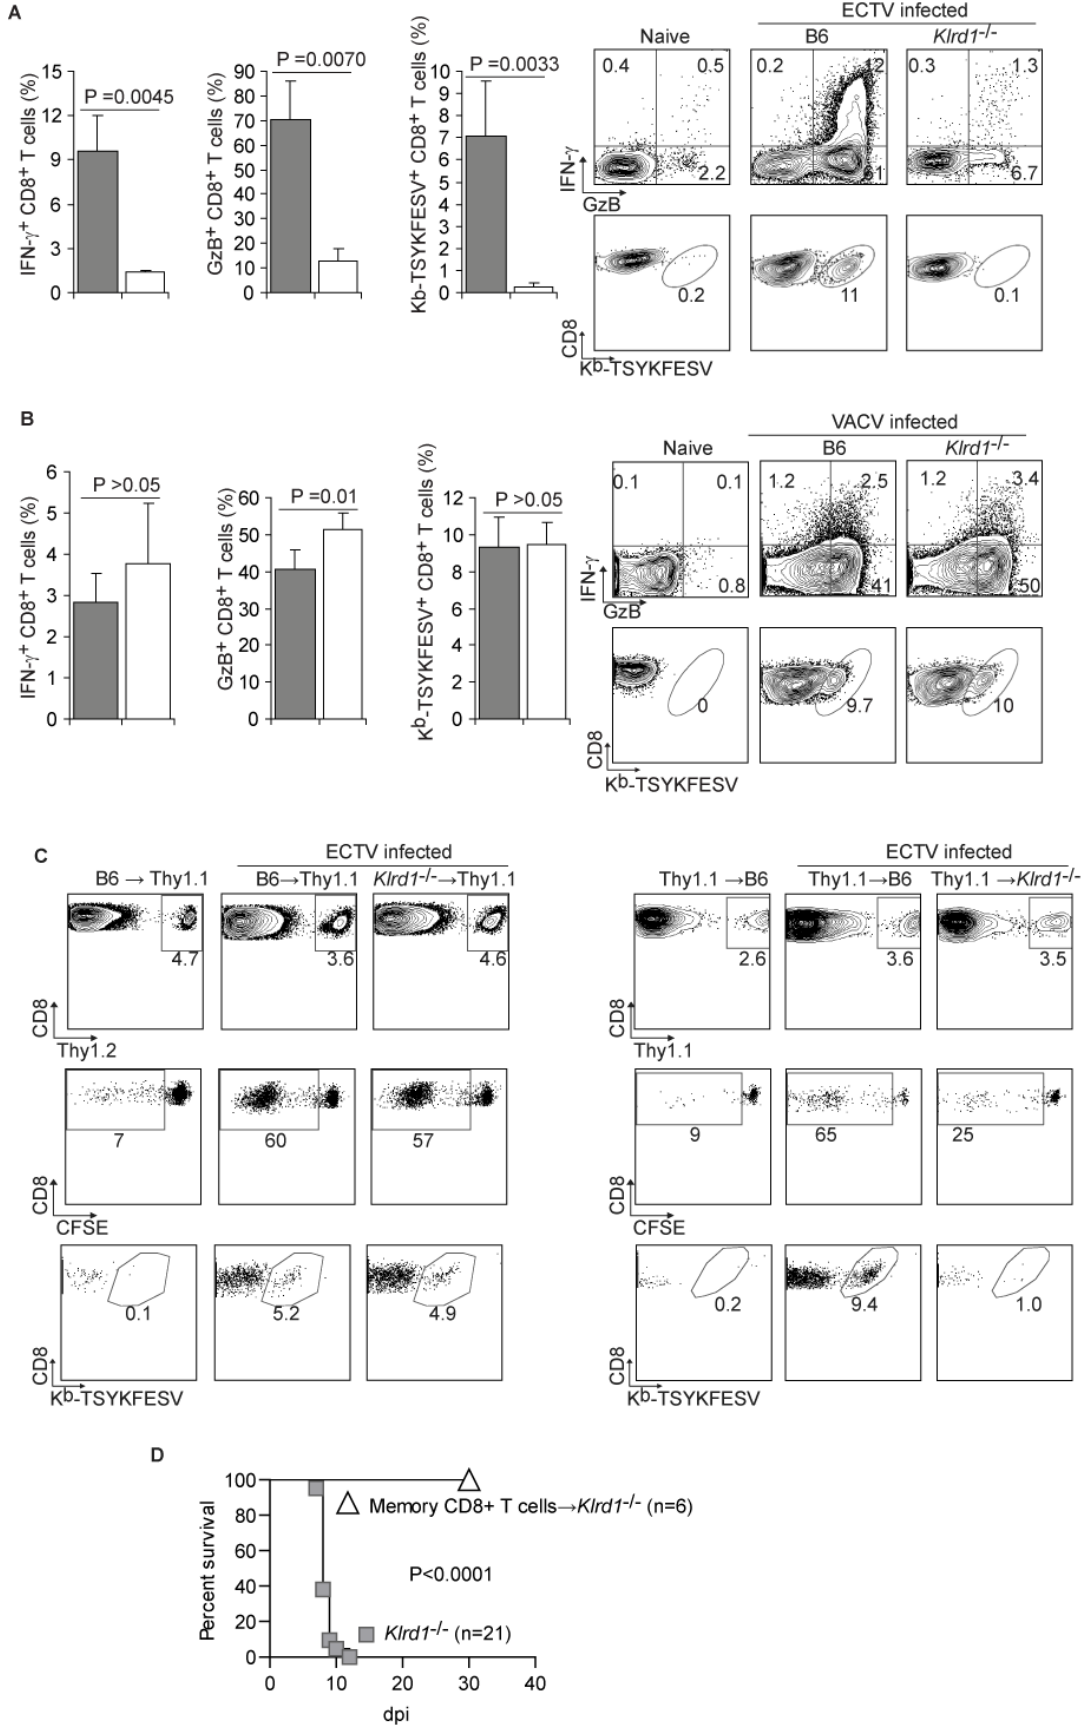

**Figure S2. Impaired NK cell control of virus loads in the absence of CD94 results in a defective CD8<sup>+</sup> T cell response.** **A)** Wild type B6 or CD94-deficient mice were infected with ECTV in the footpad and the splenic CD8<sup>+</sup> T cell responses were determined by flow cytometry 7 dpi. The column graphs on the right are the cumulative data for 3 experiments with 3-5 ECTV-infected mice/group. Parameters as indicated (gray columns, wild type B6 mice; white columns, CD94-deficient mice). Representative flow cytometry plots for infected and control uninfected mice as used to collect the data on the column graphs are shown on the right. **Upper plots:** IFN- $\gamma$  and GzB following *ex vivo* re-stimulation with VACV-infected cells. **Lower panel:** surface staining with H2-K<sup>b</sup>-TSYKFESV dimers. Plots are gated on CD8<sup>+</sup> CD3<sup>+</sup> cells. **B)** Wild type or CD94-deficient B6 mice were infected with VACV i.p. and the splenic CD8<sup>+</sup> T cell responses were determined by flow cytometry 7 dpi. The column graphs on the right are the summary data for 5 ECTV-infected mice/group. Parameters as indicated (gray columns, wild type B6 mice; white columns, CD94-deficient mice). The flow cytometry plots on the right are from representative individual mice used to obtain the data on the column graphs. **Upper panel:** IFN- $\gamma$  and GzB following *ex vivo* re-stimulation with VACV-infected cells. **Lower panel:** surface staining with H2-K<sup>b</sup>-TSYKFESV dimers. Plots are gated on CD8<sup>+</sup> CD3<sup>+</sup> cells. **C)** Responses of adoptively transferred CD8<sup>+</sup> T cells from wild type B6 or CD94-deficient mice into CD94-sufficient mice or CD94-deficient mice, as indicated. Total lymphocytes from naïve CD94-sufficient or CD94-deficient mice were labeled with CFSE, injected i.v. into Thy1.1 or Thy1.2 congenic mice. One dpi the recipient mice were infected with ECTV. The donor CD8<sup>+</sup> T cell responses were determined in spleens 7 dpi. **Upper panels:** gated on total CD8<sup>+</sup> cells. **Middle and lower panels:** gated on CD8<sup>+</sup> cells from donor origin with gates shown in the upper panels. The data are representative from two experiments with three pooled mice/group. **D)** CD94-deficient mice adoptively transferred with magnetically purified CD8<sup>+</sup> T cells from CD94-deficient VACV-immune mice or naïve CD94-deficient were infected with ECTV and survival was monitored.

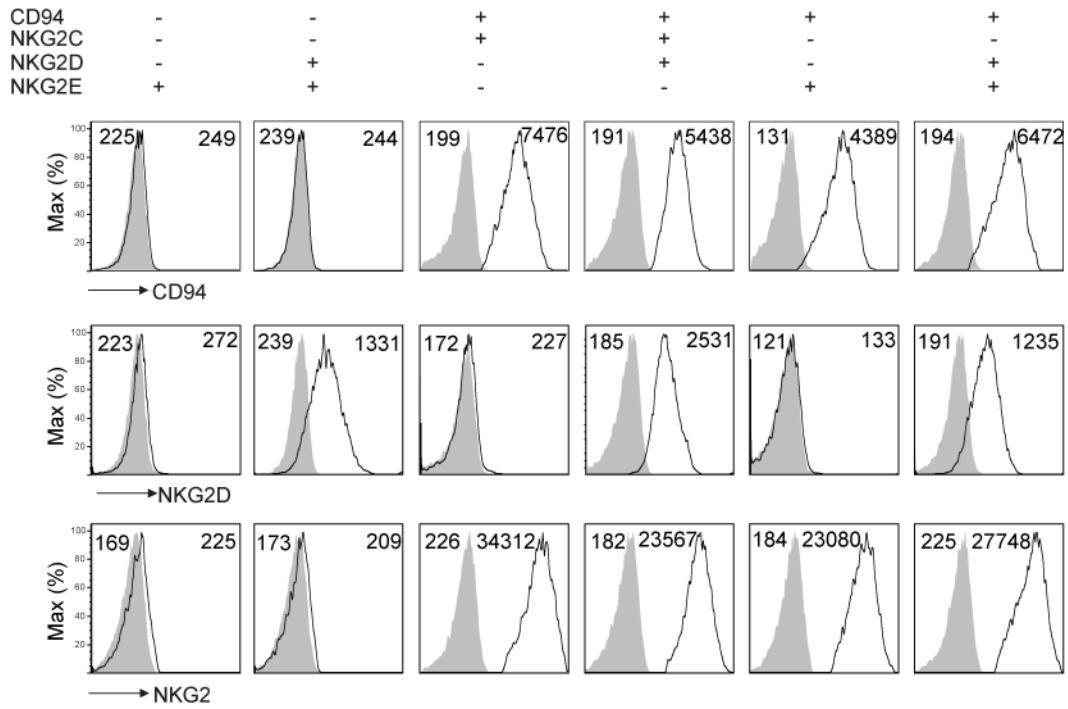

**Figure S3. Surface staining of reporter cells.** NFAT-GFP reporter cells expressing the indicated molecules were surface stained, as indicated, and analyzed by flow cytometry. Numbers indicated the mean fluorescence intensity of the nearest peak.
